# Supplementary material
Source: HighWire-hosted journal article supplement (https://thorax.bmj.com/content/72/5/430)

## All papers – overlapping populations

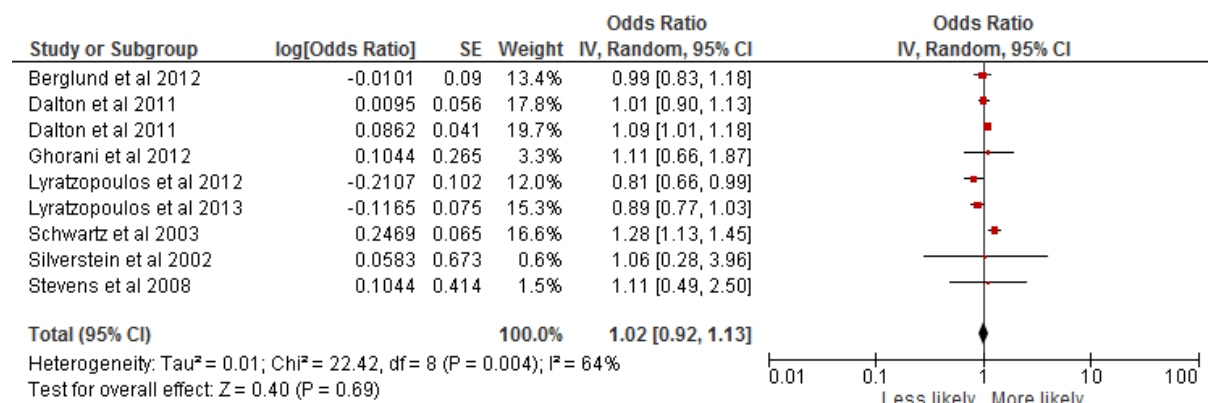

## Sensitivity analysis – alternative Dalton paper

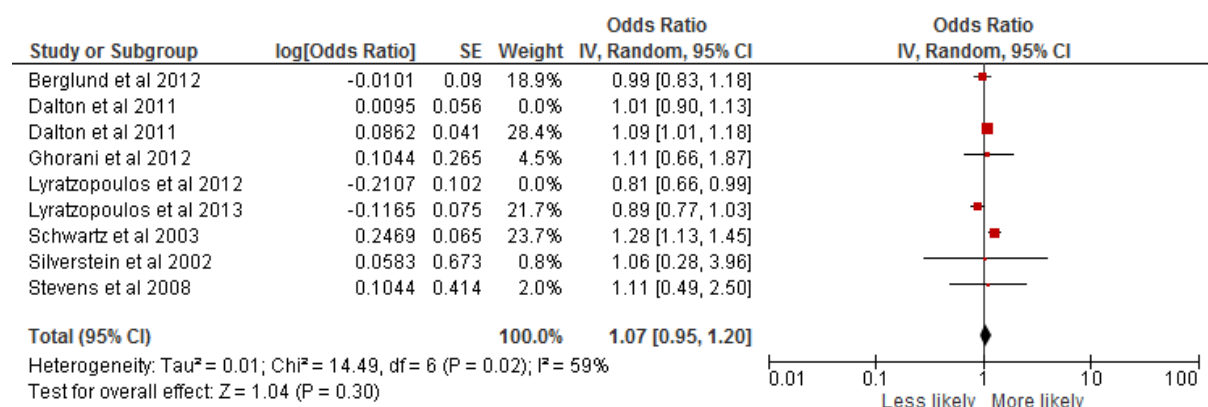

## Sensitivity analysis – alternative Lyratzopoulos paper

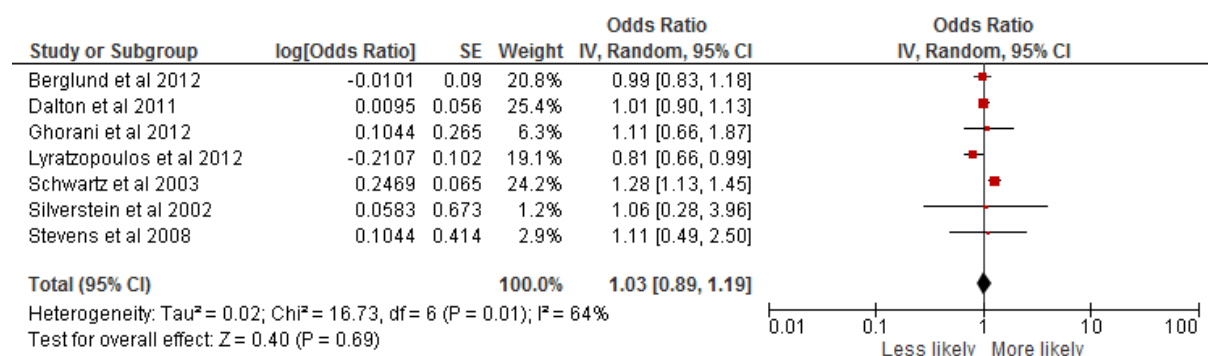

Supplement: inline-supplementary-material-6 [file inline-supplementary-material-6.pdf]
